# Supplementary material
Source: publisher figshare collection journal article supplement (https://gsajournals.figshare.com/ndownloader/files/23092565)
Supplement: Supplementary file 1 [file 23092565]

1 TAAATCTGGAGCCGGTGAGCGTGGGTCTCGCGGTATCATTGCAGCACTGGGGCCAGATGGTAAGCCCTCCCGTATCGTAGTTATCTACACGACGGGGAGT

101 CAGGCAACTATGGATGAACGAAATAGACAGATCGCTGAGATAGGTGCCTCACTGATTAAGCATTGGTAACTGTCAGACCAAGTTTACTCATATATACTTT

201 AGATTGATTTAAAACTTCATTTTTAATTTAAAAGGATCTAGGTGAAGATCCTTTTTGATAATCTCATGACCAAAATCCCTTAACGTGAGTTTTCGTTCCA

301 CTGAGCGTCAGACCCCGTAGAAAAGATCAAAGGATCTTCTTGAGATCCTTTTTTTCTGCGCGTAATCTGCTGCTTGCAAACAAAAAAACCACCGCTACCA

401 GCGGTGGTTTGTTTGCCGGATCAAGAGCTACCAACTCTTTTTCCGAAGGTAACTGGCTTCAGCAGAGCGCAGATACCAAATACTGTTCTTCTAGTGTAGC

501 CGTAGTTAGGCCACCACTTCAAGAACTCTGTAGCACCGCCTACATACCTCGCTCTGCTAATCCTGTTACCAGTGGCTGCTGCCAGTGGCGATAAGTCGTG

601 TCTTACCGGGTTGGACTCAAGACGATAGTTACCGGATAAGGCGCAGCGGTCGGGCTGAACGGGGGGTTCGTGCACACAGCCCAGCTTGGAGCGAACGACC

701 TACACCGAACTGAGATACCTACAGCGTGAGCTATGAGAAAGCGCCACGCTTCCCGAAGGGAGAAAGGCGGACAGGTATCCGGTAAGCGGCAGGGTCGGAA

801 CAGGAGAGCGCACGAGGGAGCTTCCAGGGGGAAACGCCTGGTATCTTTATAGTCCTGTCGGGTTTCGCCACCTCTGACTTGAGCGTCGATTTTTGTGATG

901 CTCGTCAGGGGGGCGGAGCCTATGGAAAAACGCCAGCAACGCGGCCTTTTTACGGTTCCTGGCCTTTTGCTGGCCTTTTGCTCACATGTTCTTTCCTGCG

1001 TTATCCCCTGATTCTGTGGATAACCGTATTACCGCCTTTGAGTGAGCTGATACCGCTCGCCGCAGCCGAACGACCGAGCGCAGCGAGTCAGTGAGCGAGG

1101 AAGCGGAAGAGCGCCCAATACGCAAACCGCCTCTCCCCGCGCGTTGGCCGATTCATTAATGCAGCTGGCACGACAGGTTTCCCGACTGGAAAGCGGGCAG

1201 TGAGCGCAACGCAATTAATGTGAGTTAGCTCACTCATTAGGCACCCCAGGCTTTACACTTTATGCTTCCGGCTCGTATGTTGTGTGGAATTGTGAGCGGA

1301 TAACAATTTCACACAGGAAACAGCTATGACCATGATTACGCCAAGCTcactCGTTTAGGCTATTCCCCTATTTTTGATATTCCTTCGCACATatgaaaac

1401 tactttttttcgaaactgtTAACTCCAGAATTTATAAATCTATAGCCCTTACTTGATTATTTATTATCATGGTTACTCACCTCAtgtctctttctctttt

1501 caagAAGTCTTCGTTCATATCTGTTGTCTCTTTCCTCCTTTTGAATCTCTGCTTTGCTCTTCGCCAttgtttcctgaaaataatgtAACTTGAATTGTGt

1601 aatatacttttttaatttgaatttggcTTGTAACGCGGAATCACTACGTGCGGGATCATTTCTTACTAGAAAACCCAGAAAATGCCATATTTCACTTATC

1701 TCGGGGTcatttctaattagaaaagctacaaaaaccatttctaattACGGTGACTTTAGAACTGGTCGAAATAGCTAATTAGAAATGGGTTTTTGCTAAT

1801 TAGAGGTGACTCTATGTTATCTGAGTAAGCCTCGTTTGTATGTAAACTCACAGTACTAATAAATGCAAGACACCCGGGTTTGTCTAGatatgaaataatt

1901 gaaatatcaATTCTGACAGACAATAATGGTAATCTTGATAAGGAGTTCCACGCCCAGGAGAACACGttagttttcttgtttttgattGCGTGCgttattt

2001 tggagaaaaactcgattttttacaaaataattttttgaaaggaacactgttcaataagttttgtcttttttctcaGTTGTGATAcggttttttattcttt

2101 tttgtaGTTATACAGAAGACCGcctgcaggATTTGAGTAGAGCACTCGAGGGGAGAAAATGCGGAGAGAAGAACCCAGCATCTTAATAAAATTATATAAT

2201 TTTGAATAAAATCAAATTAAAAATAAGATTAATTGAAACACAACAATAGAATGCAGAAAATTACTCATAAGAAATAATTTATTTTGAAAGAAGTTGTGTC

2301 GATTTACGATAAAAACTACACGCAAACGAGGCTCCGCGTTTACACCGTTTGGCAATGGAGCGCGCTTGCTATTAGATTTTAGGCCAGCTCAACGAAAGTT

2401 TAATTTATTTTTCTTCTTTTTTTCCATTTTTTTGAGTAAAATATCGAATTTTTTGTATTAATTCTGTAAATTTTATAATTTGCAACTATTTTGGCGTATT

2501 CTGCTTGTTTTTATCAGCGAATTTTTATGCATTTCAGTCAAAAGTTTGAGCAGGAAAAATGACATTTAGGACTTTGTAAAATTGTATTCTTAAATTTGCT

2601 TGAAAACCTACGTGTACAATTGATTTTATTGAATTTTTCTTACGTTTCCCGTTGTATCTTATTGTATTTAACTTTCATCATAAAATAATTTATTTCCAGG

2701 TAAAATATCCGACGCTCTCGTGATGGTCTCCGAGCTCATTAAAGAAAACATGCATATGAAGCTCTACATGGAGGGAACCGTCAACAACCACCACTTCAAG

2801 TGCACCTCCGAGGGAGAGGGAAAGCCATACGAGGGAACCCAAACCATGCGTATCAAGGCCGTCGAGGGAGGACCACTCCCATTCGCCTTCGACATCCTCG

2901 CCACCTCCTTCATGTACGGATCCAAGgtaagtttaaacatatatatactaactaaccctgattatttaaattttcagACCTTCATCAACCACACCCAAGG

3001 AATCCCAGACTTCTTCAAGCAATCCTTCCCAGAGGGATTCACCTGGGAGCGTGTCACCACCTACGAGGACGGAGGAGTCCTCACCGCCACCCAAGACACC

3101 TCCCTCCAAGACGGATGCCTCATCTACAACGTCAAGgtaagtttaaacagttcggtactaactaaccatacatatttaaattttcagATCCGTGGAGTCA

3201 ACTTCCCATCCAACGGACCAGTCATGCAAAAGAAGACCCTCGGATGGGAGGCCTCCACCGAGACCCTCTACCCAGCCGACGGAGGACTTGAGGGACGTGC

3301 CGACATGGCCCTCAAGCTCGTCGGAGGAGGACACCTCATCTGCAACCTCAAGgtaagtttaaacatgattttactaactaactaatctgatttaaatttt

3401 cagACCACCTACCGTTCCAAGAAGCCAGCCAAGAACCTCAAGATGCCAGGAGTCTACTACGTCGACCGTCGTCTTGAGCGTATCAAGGAGGCCGACAAGG

3501 AGACCTACGTCGAGCAACACGAGGTCGCCGTCGCCCGTTACTGCGACCTCCCATCCAAGCTCGGACACCGTTAAGTCCAATTACTCTTCAACATCCCTAC

3601 ATGCTCTTTCTCCCTGTGCTCCCACCCCCTATTTTTGTTATTATCAAAAAACTTCTCTTAATTTCTTTGTTTTTTAGCTTCTTTTAAGTCACCTCTAACA

3701 ATGAAATTGTGTAGATTCAAAAATAGAATTAATTCGTAATAAAAAGTCGAAAAAAATTGTGCTCCCTCCCCCCATTAATAATAATTCTATCCCAAAATCT

3801 ACACAATGTTCTGTGTACACTTCTTATGTTTTTTACTTCTGATAAATTTTTTTGAAACATCATAGAAAAAACCGCACACAAAATACCTTATCATATGTTA

3901 CGTTTCAGTTTATGACCGCAATTTTTACTTAAGTTCAATCCGGAAAGgtaagtttaaaATAACTTCGTATAGCATACATTATACGAAGTTATtttcagGG

4001 AGAGCAAAAGATTTTTGCTTTCGTCGTAAATCTACACACGCGTCTCTTCCGTGCGAGAGTCCAAGCCAGCAGCCAAATTCGTTGACTGAGTATTCAACGT

4101 TTATACGTTGTCGGCAACGAGAAATAGGAAAATGCATCGGGAAATGTTCTTTTTTCGATTTTTTCCAAGGTTTTGACAAATTTTACCACGAATTTTGCTA

4201 TGTTTTCAATTAAAAAATATGTTATTCAACTGTTTCTATGAGGAAAATAAGGCTTTGCATGTAATTTTCTTATTCAGCATAATTTTTAATTAATTTGAAT

4301 TTTCTGTCCTAACGTTTATTTTGTTTTCTTGGTTATGACTGATCTGAAATTAATTTTTGAATTTTAAGGTAATatgaaaaaacccgagttgaccgccaca

4401 tccgtagagaagttcctcatcgagaagttcgactccgtctccgacctcatgcaactctccgagggagaggagtcccgtgccttctccttcgacgtcggag

4501 gacgtggatacgtcctccgtgtcaactcctgcgccgacggattctacaaggaccgttacgtctaccgtcacttcgcctccgccgccctcccaatcccaga

4601 ggtcctcgacatcggagagttctccgagtccctcacctactgcatctcccgtcgtgcccaaggagtcaccctccaagacctcccagagaccgagctccca

4701 gccgtcctccaaccagtcgccgaggccatggacgccatcgccgccgccgacctctcccaaacctccggattcggaccattcggaccacaaggaatcggac

4801 aatacaccacctggcgtgacttcatctgcgccatcgccgacccacacgtctaccactggcaaaccgtcatggacgacaccgtctccgcctccgtcgccca

4901 agccctcgacgagctcatgctctgggccgaggactgcccagaggtccgtcacctcgtccacgccgacttcggatccaacaacgtcctcaccgacaacgga

5001 cgtatcaccgccgtcatcgactggtccgaggccatgttcggagactcccaataTGCGGTATTTTCTCCTTACGCATCTGTGCGGTATTTCACACCGCATA

5101 TGGTGCACTCTCAGTACAATCTGCTCTGATGCCGCATAGTTAAGCCAGCCCCGACACCCGCCAACACCCGCTGACGCGCCCTGACGGGCTTGTCTGCTCC

5201 CGGCATCCGCTTACAGACAAGCTGTGACCGTCTCCGGGAGCTGCATGTGTCAGAGGTTTTCACCGTCATCACCGAAACGCGCGAGACGAAAGGGCCTCGT

5301 GATACGCCTATTTTTATAGGTTAATGTCATGATAATAATGGTTTCTTAGACGTCAGGTGGCACTTTTCGGGGAAATGTGCGCGGAACCCCTATTTGTTTA

5401 TTTTTCTAAATACATTCAAATATGTATCCGCTCATGAGACAATAACCCTGATAAATGCTTCAATAATATTGAAAAAGGAAGAGTATGAGTATTCAACATT

5501 TCCGTGTCGCCCTTATTCCCTTTTTTGCGGCATTTTGCCTTCCTGTTTTTGCTCACCCAGAAACGCTGGTGAAAGTAAAAGATGCTGAAGATCAGTTGGG

5601 TGCACGAGTGGGTTACATCGAACTGGATCTCAACAGCGGTAAGATCCTTGAGAGTTTTCGCCCCGAAGAACGTTTTCCAATGATGAGCACTTTTAAAGTT

5701 CTGCTATGTGGCGCGGTATTATCCCGTATTGACGCCGGGCAAGAGCAACTCGGTCGCCGCATACACTATTCTCAGAATGACTTGGTTGAGTACTCACCAG

5801 TCACAGAAAAGCATCTTACGGATGGCATGACAGTAAGAGAATTATGCAGTGCTGCCATAACCATGAGTGATAACACTGCGGCCAACTTACTTCTGACAAC

5901 GATCGGAGGACCGAAGGAGCTAACCGCTTTTTTGCACAACATGGGGGATCATGTAACTCGCCTTGATCGTTGGGAACCGGAGCTGAATGAAGCCATACCA

6001 AACGACGAGCGTGACACCACGATGCCTGTAGCAATGGCAACAACGTTGCGCAAACTATTAACTGGCGAACTACTTACTCTAGCTTCCCGGCAACAATTAA

6101 TAGACTGGATGGAGGCGGATAAAGTTGCAGGACCACTTCTGCGCTCGGCCCTTCCGGCTGGCTGGTTTATTGCTGA

**Figure S2**. (A) Schematic of cargo insertion vector pMS81 and (B) corresponding color-coded sequence
